1 **Dendrite: A Structured, Accessible, and Queryable Pathology Search Database for**  
2 **Streamlined Experiment Planning**

3 Yunrui Lu<sup>1,\*</sup>, Robert Hamilton<sup>1,\*</sup>, Jack Greenberg<sup>2</sup>, Gokul Srinivasan<sup>1</sup>, Parth Shah<sup>1</sup>, Sarah  
4 Preum<sup>3</sup>, Jason Pettus<sup>1</sup>, Louis Vaickus<sup>1</sup>, Joshua Levy<sup>1,4,5,6,7,8,\*\*</sup>

- 5  
6 1. Department of Pathology and Laboratory Medicine, Dartmouth Health, Lebanon, NH  
7 03766 USA  
8 2. Department of Computer Science, Middlebury College, Middlebury, VT 05753 USA  
9 3. Department of Computer Science, Dartmouth College, Hanover NH 03756 USA  
10 4. Department of Dermatology, Dartmouth Health, Lebanon, NH 03766 USA  
11 5. Department of Epidemiology, Dartmouth Geisel School of Medicine, Lebanon, NH 03766  
12 USA  
13 6. Program in Quantitative Biomedical Sciences, Dartmouth Geisel School of Medicine,  
14 Lebanon, NH 03766 USA  
15 7. Department of Pathology and Laboratory Medicine, Cedars Sinai Medical Center, Los  
16 Angeles, CA 90048 USA  
17 8. Department of Computational Biomedicine, Cedars Sinai Medical Center, Los Angeles,  
18 CA 90048 USA

19

20 \* Authors contributed equally as co-first authors.

21 \*\* To whom correspondence should be addressed: [joshua.j.levy@dartmouth.edu](mailto:joshua.j.levy@dartmouth.edu)

22

23 **Corresponding Author Contact Information:**

24 Joshua J. Levy PhD

25 Assistant Professor of Pathology and Dermatology

26 Adjunct Assistant Professor of Epidemiology

27 Faculty, Quantitative Biomedical Sciences

28 Machine Learning Co-Director, Emerging Diagnostic and Investigative Technologies

29 Biostatistics and Bioinformatics Shared Resource, Dartmouth Cancer Center

30 Dartmouth-Hitchcock Medical Center

31 1 Medical Center Drive, Department of Pathology and Laboratory Medicine, Lebanon, NH

32 03756

33 Phone: (925) 457-5752 | Email: [joshua.j.levy@dartmouth.edu](mailto:joshua.j.levy@dartmouth.edu)

34

35 **Abstract**

36 Pathology reports contain vital information, yet a significant portion of this data remains  
37 underutilized in electronic medical record systems due to the unstructured and varied nature of  
38 reporting. Although synoptic reporting has introduced reporting standards, the majority of  
39 pathology text remains free-form, necessitating additional processing to enable accessibility for  
40 research and clinical applications. This paper presents Dendrite, a web application designed to  
41 enhance pathology research by providing intelligent search capabilities and streamlining the  
42 creation of study cohorts. Leveraging expert knowledge and natural language processing  
43 algorithms, Dendrite converts free-form pathology reports into structured formats, facilitating  
44 easier querying and analysis. Using a custom Python script, Dendrite organizes pathology  
45 report data, enabling record linkages, text searches, and structured drop-down menus for  
46 information filtering and integration. A companion web application enables data exploration and  
47 export, showcasing its potential for further analysis and research. Dendrite, derived from  
48 existing laboratory information systems, outperforms existing implementations in terms of  
49 speed, responsiveness, and flexibility. With its efficient search functionality and support for  
50 clinical research and quality improvement efforts in the pathology field, Dendrite proves to be a  
51 valuable tool for pathologists. Future enhancements encompass user management integration,  
52 integration of natural language processing and machine learning to enhance structured  
53 reporting capabilities and seamless integration of Dendrite with the vast repository of genomics  
54 and imaging data.

55

56 **Keywords:** natural language processing; laboratory information systems; bladder cancer; colon  
57 cancer; pathology reports

58

## 59 Introduction

60 Pathology, derived from the word *pathos*, is the study of disease. Disease progression is largely  
61 characterized by the use of increasingly sophisticated histological and molecular assays.  
62 Pathological examination of these assays plays a critical role in diagnosis, prognostication, and  
63 treatment, potentially enhancing prevention and screening efforts <sup>1</sup>. For instance, histological  
64 and molecular information often serves as the baseline and endpoint of drug trials for clinical  
65 oncology applications <sup>2</sup>. Pathology reports play a crucial role in capturing the clinical narrative  
66 reflecting these assessments, encompassing vital information related to diagnosis, prognosis,  
67 and specimen processing. Traditional approaches in natural language processing (NLP) have  
68 employed rule-based or machine-learning analytics to extract valuable insights from textual  
69 patterns contained in these reports, enabling clinical endpoints and biomarker information to be  
70 derived from these reports <sup>3</sup>.

71  
72 Leveraging the wealth of information in pathology reports for large-scale databases is costly and  
73 labor-intensive, but if harnessed, has the potential to contribute significantly to comprehensive  
74 cancer registries, enabling more precise population-level studies and identification of novel  
75 associations between clinical features and outcomes. The subjective nature and use of  
76 nonstandard mapping terminology in anatomic pathology reports limit their interoperability with  
77 electronic medical record (EMR) systems— many efforts have been taken to further structure this  
78 information into digestible queryable formats such as the migration of synoptic reporting  
79 information into EPIC Beaker <sup>4,5</sup>.

80  
81 Structuring this data into more standardized formats has the potential to improve the utilization  
82 of pathological reporting information. Such resources could be readily pooled into larger  
83 electronic health record systems such as EPIC, which could spur future research/clinical  
84 applications. Currently, many clinical research studies still rely on manual chart review, which is  
85 often inefficient and prone to error. To overcome these challenges, there is a growing need for  
86 advanced database management tools that can efficiently store, manage, and analyze  
87 pathology data for research purposes. The use of database resources can enhance the  
88 efficiency of clinical research and quality improvement planning. Collaborating with a domain  
89 expert pathologist in developing these databases can ensure that the captured information is  
90 pertinent and applicable to the work of various diagnostic subspecialties. Furthermore, several  
91 recent studies have sought to leverage restructured pathology text reports to perform various  
92 classification (e.g., study case complexity for reimbursement and RVUs) and information  
93 extraction tasks (e.g., extracting gross/histo-morphology). Many of these algorithms operate on  
94 unstructured free text <sup>6,7</sup>.

95  
96 Our pathology department at a mid-sized academic center, is transitioning from an Oracle  
97 Cerner laboratory information system (LIS) to EPIC Beaker LIS. We were motivated by previous  
98 attempts to create business intelligence systems that could swiftly retrieve structured and  
99 unstructured pathology reporting data <sup>8</sup>. As a result, we designed our own in-house solution with  
100 enhanced search capabilities, called Dendrite. Dendrite leverages an internal pathology  
101 reporting database structured from pathology notes.

102

103 Dendrite refers to both the pathology reporting database, the codebase used to generate this  
104 database as well as its front facing web interface. This database encompasses nearly 1 million  
105 pathology reports, extracted from 2008 to 2022 across various diagnostic subspecialties.  
106 Dendrite, designed by pathologists for pathologists, employs traditional extraction methods  
107 based on expert domain knowledge to capture reporting information such as staining results  
108 and procedural codes along with nearly one hundred additional reporting fields. Dendrite allows  
109 for the arbitrary combination of multiple search criteria spanning nearly all facets of the  
110 pathology search, with capabilities similar to systems like Cerner, allowing for the rapid display  
111 of disparate information sources. The platform was developed to enable a real-time human-  
112 computer web application interface that supports interactive search, filtering and aggregation.  
113 Reports can be viewed through an output display table that can be edited in real-time and  
114 exported. Dendrite has been integrated with the Dartmouth Cloud or Augmet, an AWS cloud  
115 resource that seamlessly integrates with the electronic health record (EHR) system<sup>9</sup>. This  
116 integration has further improved Dendrite's capabilities for imaging and genomics applications,  
117 enabling swift querying and exporting of genomics and imaging data in addition to a wide array  
118 of pathology reporting fields.

119  
120 In the future, Dendrite can be used to supplement innovative cancer screening and surveillance  
121 approaches, enhance patient outcomes, facilitate the rapid prototyping and development of  
122 advanced machine learning algorithms for text, genomics, and imaging, and broaden our  
123 understanding of cancer epidemiology<sup>10-12</sup>. The aim of this study is to demonstrate the  
124 functionality of this search tool. Subsequent studies will focus on documenting its  
125 implementation.  
126

## 127 **Methods**

### 128 **Data Collection and Development/Description of Dendrite Database**

129 After IRB approval, we developed a set of custom Python scripts to process ten years worth of  
130 pathology reporting data, corresponding to 749,136 reports from the end of 2011 to 2021. We  
131 adopted an extract, transform, load (ETL) framework that used regex for report deidentification  
132 and stain dictionaries for the accurate reporting of 738 stains. It also parsed and delineated  
133 different report sections (e.g., dividing diagnostic text by specimen source and free text).  
134 Reporting information was reorganized into the following tables:

- 135  
136
- 137 ● Stain orders and results
  - 138 ● Slide imaging information
  - 139 ● Cytology preparation methods
  - 140 ● Cytological findings
  - 141 ● Parsed and free diagnostic text
  - 142 ● Parsed and free discussion text
  - 143 ● Flow cytometry results
  - 144 ● Synoptics reporting
  - Clinical history

- 145 • HPV results (cytology)
- 146 • Specimen adequacy
- 147 • Gross specimen reports
- 148 • Molecular findings
- 149 • Additional relevant anatomic pathology information (e.g., practicing pathologist, outside
- 150 consult, EDTA, subspecialty identifiers, addendum, etc.)

151  
152 **Supplementary Table 1** provides the schema / reporting fields for each table. This information  
153 can be filtered and joined through record linkages, text searches and structured drop-down  
154 menus (e.g., subsetting by stain). The dendrite database can be readily updated through  
155 automatic export of Cerner stored pathology reports and passing these reports through the  
156 Python script. All reporting fields were deidentified using the Python script that uses regex to  
157 remove information using a database of tens of thousands of first and last names. Dates were  
158 stripped although a custom index date was stored which allows for the recovery of this  
159 information.

160  
161 This pathology database serves as the backend for an accompanying web-based tool that can  
162 query this information. A web application was developed using Plotly Dash <sup>13</sup>, a Python tool that  
163 generates interactive websites– this interactive web application allows for collaborating  
164 pathologists to explore this database through multiple search tables, to be described in  
165 subsequent sections. We hosted this database and accompanying web application using an  
166 Amazon Web Services (AWS) instance for internal access.

## 167 Web Application Description

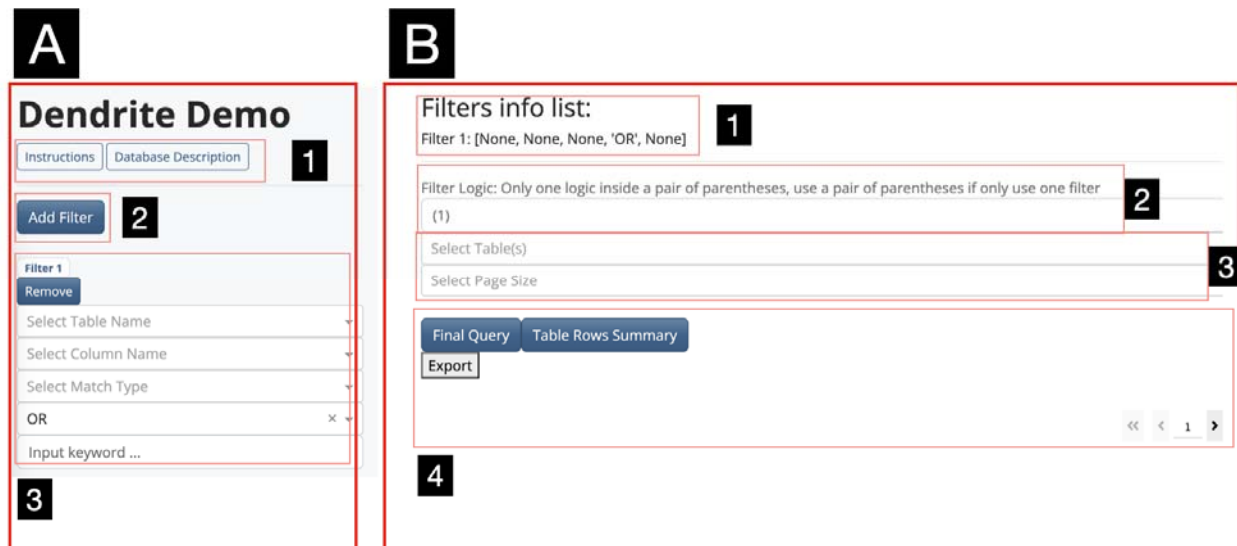

168  
169 **Figure 1: Dendrite Initial Interface: A)** Filters component. (1) Instruction button and database  
170 description button. (2) Adding filters button. (3) Filter unit. **B)** Query component. (1) Filter list  
171 information display. (2) Logic statement input. (3) Target table(s) selection and page size  
172 selection. (4) Table query, information summary and display.

## 173 Multiple Search Criteria

174 The Dendrite web application layout was inspired by the web design of NCBI's search tool and  
175 is divided into two sections (**Figure 1**): a) a tool for constructing filters to query the database (left  
176 panel) and b) a tool to explore the queried results and browse/export rapidly compiled  
177 information tables (right panel). The left panel is vertically scrollable to allow the addition of  
178 multiple filters while the right panel is static. Several buttons have been added which provide  
179 detailed instructions (a dynamically extending instructions tab on the right-hand side for  
180 additional usage details) for operating the application and providing further description on the  
181 database via a popup (**Figure 1A**). Below the instruction buttons are various buttons which  
182 control the addition of report database filters (i.e., Add/Remove filter) and the subunits of the  
183 filter, which allow for the selection of reporting criteria from multiple search tables (**Figure 1A**).  
184 By clicking on the Add Filter, physicians can add multiple filter units in order to build multiple  
185 search conditions.

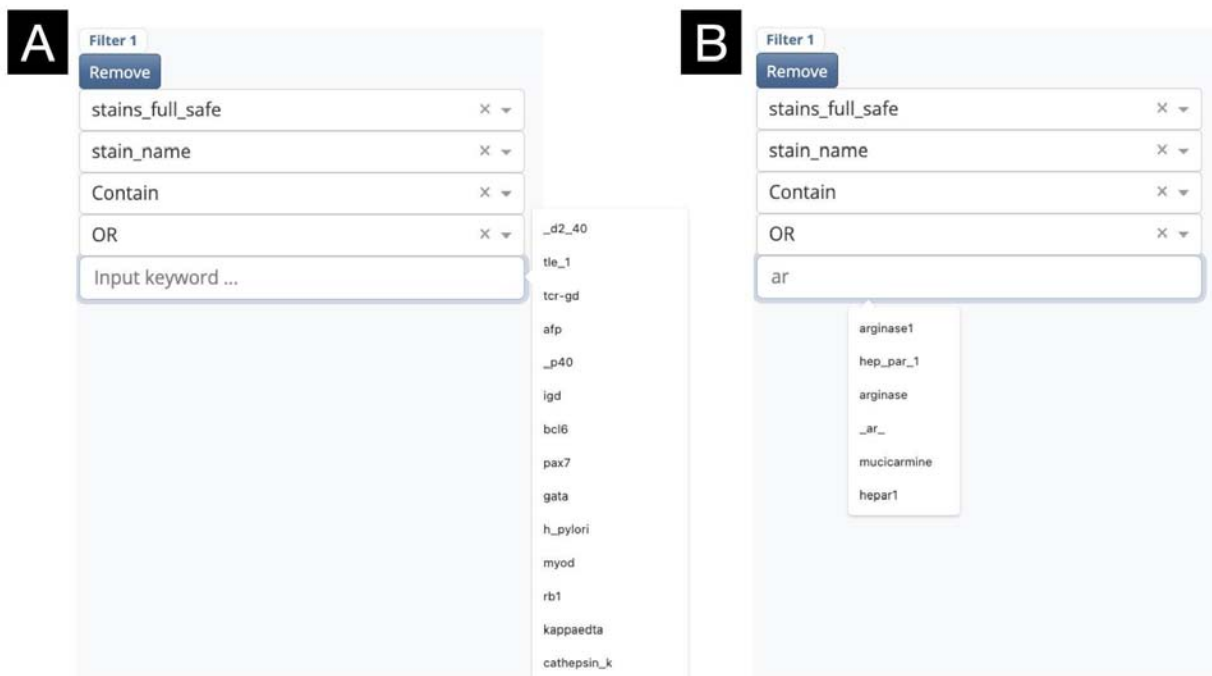

186  
187 **Figure 2: Keyword Input Prompts: (A) Initial prompts. (B) Prompts automatically refined**  
188 **through user input**

189  
190 *Description of Filter:* Filters are specified by the user to query a *table* (e.g., all stains contained  
191 in stains\_full\_safe) for a specific field (e.g., stains as selected from stain\_name) (**Figure 2**). The  
192 user is then prompted via an *input keyword* argument to enter free text to query the table field  
193 with (e.g., searching for carcinoma) should the field contain free text, else the user can select  
194 from a list of unique values from a dropdown menu that dynamically suggests these values  
195 based on an initial input. Physicians can either choose an individual term from a dropdown  
196 menu or input any keyword. Dendrite will then continue to use this keyword to generate further  
197 accurate suggestions. Physicians can, again, choose one of the suggestions or input any  
198 additional keywords to yield the final result. Furthermore, users can select whether query text  
199 from the selected field should exactly match or contain the keyword (the latter option produces



200 more flexible searches at the expense of specificity). The creation of a filter will select all  
201 associated pathology reports by unique identifiers.

## 202 Adjustable Search Logic

203 Filters are indexed (i.e., assigned a number) by the order they are added and can be removed  
204 to delete the filter. Additional functionality is provided to combine the search results from  
205 multiple tables. This is provided through a logical dropdown menu, with the following options: 1)  
206 “AND”– the intersection of reports from the current and previously defined filter, 2) “OR”– the  
207 union of reports from the current and previous filter, and 3) “NOT”– the set difference of reports  
208 from the current and previous filters. A list of available filters is made available to the user with  
209 along an editable logic statement that specifies the combined search criteria, generated from  
210 the initial logical dropdown menus (e.g., ((1 AND 2) OR 3) represents the union between filter 3  
211 and the intersection between filters 1 and 2). This logical statement can be adjusted based on  
212 any possible combination/permutation of filters– for instance, ((1 AND 3) OR (2 AND 4)),  
213 representing the union between the intersection between filters 1 and 3 and separately the  
214 intersection between filters 2 and 4. Once the final conditional logic has been specified,  
215 physicians can select one or more target table(s) for viewing. Running the final query will  
216 generate the final set of pathology reports selected using the conditional logic states and merge  
217 together the selected tables by these unique identifiers. Further description of the search  
218 process can be found in the supplementary materials (**Supplementary Figure 1**).

## 219 Interactive Result Table

220 The final table display is visualized in the lower right of the web application, generated after  
221 running the query (**Figure 3**). The number of unique patients / reports can be found using the  
222 “Table Rows Summary” button. The final table is organized into multiple pages. Sorting and  
223 filtering operations, similar to that featured in an excel spreadsheet, can be used to further sort,  
224 query or subset the table by multiple columns. All the results can be exported/downloaded into  
225 multiple spreadsheet formats for further analysis (**Supplementary Figure 2**).

226

The screenshot displays the 'Dendrite Demo' web application. On the left, a sidebar contains 'Instructions' and 'Database Description' buttons, an 'Add Filter' button, and a 'Filter 1' section with a 'Remove' button. Below this, a list of filters is shown: 'discussions\_safe', 'ds\_txt', 'Contain', 'OR', and 'specimen'. A 'Filter' label is overlaid on the 'OR' filter. The main area shows 'Filters info list:' with 'Filter 1: ['discussions\_safe', 'ds\_txt', 'Contain', 'OR', 'specimen']'. Below this, 'Filter Logic: Only one logic inside a pair of parentheses, use a pair of parentheses if only use one filter' is displayed. A text input field contains '(1)' and a dropdown menu shows 'x stains\_full\_safe x'. Below that, another dropdown menu shows '5 x'. A 'Final Query' button and a 'Table Rows Summary' button are visible. An 'Export' button is also present. A 'Sorting' label is overlaid on the table header. The table has columns: 'id\_safe', 'block\_number', 'stain\_name', and 'description'. The first row is highlighted in red and contains 'ec91d046-ee62-11ec-9e49-8c8caa4dd5eb', 'a1', and 'see above'. The second row contains 'ec91d046-ee62-11ec-9e49-8c8caa4dd5eb', 'a1', and 'cd20'. The third row contains 'ec91d046-ee62-11ec-9e49-8c8caa4dd5eb', 'a1', and 'bc12'. The fourth row contains 'ec91d046-ee62-11ec-9e49-8c8caa4dd5eb', 'a1', and 'bc16'. The fifth row contains 'ec91d046-ee62-11ec-9e49-8c8caa4dd5eb', 'a1', and 'cyclin\_d1'. At the bottom right, there are navigation arrows and a page number '1'.

227

228

229 **Figure 3: Illustration of filtering and sorting functionality in results display table**

230 **Results**

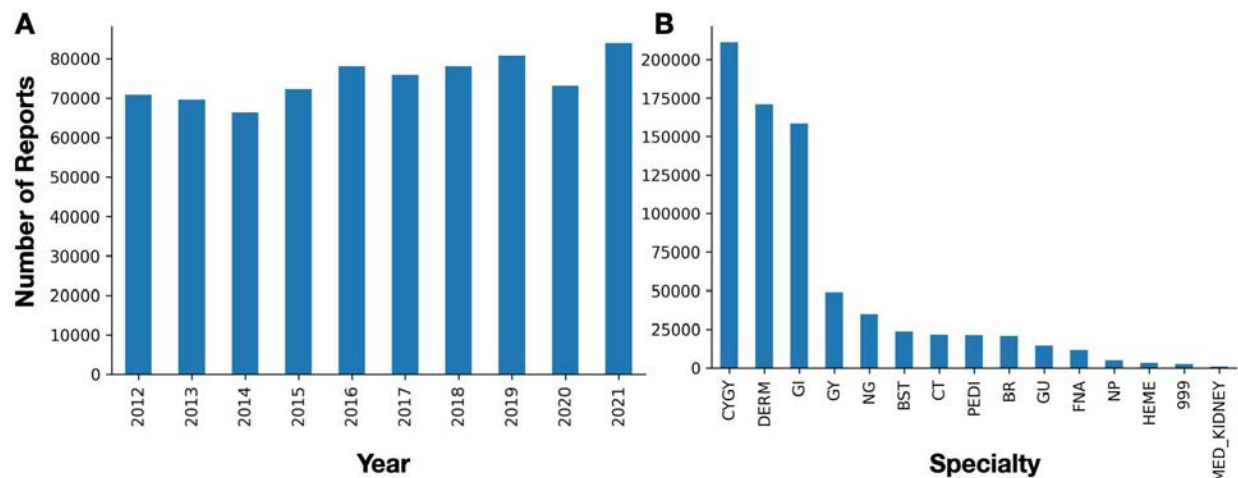

231 **Figure 4: Breakdown of number of included pathology reports by: A) Year, B) Subspecialty**

232

233 **Description of Select Database Tables**

234

235 A total of 749,136 reports were extracted from December 2011 to December 2021 (Figure 4),  
236 corresponding to 272,714 patients, assessed across 13 diagnostic subspecialties from 79  
237 pathologists. Of these cases, 46,846 required intradepartmental consult (extraction of “qacc”  
238 from report), leading to a total of 2,764 consensus conferences (extraction of “conf”) and  
239 discussion amongst pathologists were reported for 3,330 reports (“dw\_doc” reporting signature).  
240 Synoptic reporting was identified in 9,700 reports, though the availability of this information  
241 continues to grow. Addendums were found for 26,026 reports. Staining results were reported  
242 across 165,140 specimen blocks, and reports were linked to a total of 388,679 whole slide  
243 images. Clinical history, nuanced molecular findings (e.g., MLH1 hypermethylation), and flow  
244 cytometry findings were reported for 494,122, 162,059, and 3,065 reports respectively.

245 **User Tests**

246 As an initial test of Dendrite’s functionality, we asked collaborating pathologists to perform a  
247 series of example queries. Future works will explore the impact this database system has on  
248 facilitating timely review by assessing widespread usage across the department but was outside  
249 of the scope of this technical note.

250

251 *Urine Specimen Atypia:* A cytopathologist conducted a search to locate voided urine cytology  
252 specimens to assess instances of specimen atypia for the assessment of high-grade urothelial  
253 carcinoma. First, cases were filtered using the non-gynecological specimens table (*ng\_safe*),  
254 searching for voided urine in the specimen *source* field (Figure 5). While we were able to  
255 identify a number of specimens using this search functionality, ultimately we opted to use the  
256



257 diagnostic text (*diagnoses\_safe*), searching for voided specimens, as we felt the free text was  
258 less restrictive (**Figure 6**). By specifying a search for voided specimens, we were able to  
259 remove washes and upper tract specimens. This search yielded approximately 4,178 reports,  
260 close to the number of voided urine specimens reported over the data collection period. We  
261 queried the diagnostic tables and merged these with a table pertaining to additional pathology  
262 reporting information, including sign-out time. This table was exported to a CSV format and  
263 further processed using a custom R script (using the “grep” function) to yield the number of  
264 negative, atypical, suspicious and positive cases over time. We plotted the incidence of these  
265 diagnostic categories over time along with a barplot depicting the overall categorization in  
266 **Figure 7**, demonstrating that in less than a minute, we could conduct a longitudinal study of  
267 urine specimen atypia to inform rapid bladder cancer screening. For instance, by plotting the  
268 incidence of different diagnoses, we found that the number of negative findings increased from  
269 2016 to 2018, while the number of positive findings decreased from 2016 to 2018. As our  
270 department implemented The Paris System for Reporting Urine Cytology in 2018<sup>14</sup>, these  
271 findings corroborate with previous research indicating early adoption of these reporting  
272 guidelines. Further analysis was conducted using hierarchical Bayesian regression modeling  
273 (utilizing the *brms* and *emmeans* R packages)<sup>15–17</sup>. In this model, we treated the level of  
274 implementation—pre-publication (before 2016), publication of the guidelines prior to its actual  
275 implementation (2016–2016), and post-implementation (after 2018)—as an ordinal variable with  
276 monotonic effects. Incorporating pathologist-level random intercepts, we identified a reduction in  
277 specimens deemed atypical across the implementation stages, as detailed in **Table 1**.  
278  
279

The screenshot shows the 'Dendrite Demo' web interface. On the left, there are navigation links for 'Instructions' and 'Database Description'. Below them is an 'Add Filter' button. A 'Filter 1' section contains a 'Remove' button and a list of filters: 'cy\_ng\_safe', 'source', 'Contain', 'OR', and 'urine'. The 'urine' filter is currently active. On the right, the 'Filters info list' shows 'Filter 1: ['cy\_ng\_safe', 'source', 'Contain', 'OR', 'urine ']'. Below this is a 'Filter Logic' section with a text input containing '(1)', a 'Select Table(s)' dropdown, and a 'Select Page Size' dropdown. At the bottom of the filter section are buttons for 'Final Query', 'Table Rows Summary', and 'Export'. The main content area displays a list of search results for 'urine', including: 'A: Urine, Voided B: Specimen is submitted to Mayo Medical Laboratori', 'Ureter: left (cystoscopic urine)', 'Urine, Cystoscopic (right renal pelvic urine)', 'Urine, ileal conduit (from clean pouch)', 'Urine, ileal Conduit cathed', 'Urine, Cystoscopic, Left renal', 'Urine (Left Nephrostomy Tube)', 'Pelvic urine, right (washing)', 'Urine, Voided (voided kidney stone)', 'Urine, catheterized (Foley tube)', and 'Urine (right renal wash)'. A pagination control at the bottom right shows '<< < 1 > >>'.

280  
281 **Figure 5: Querying non-gynecological table for voided urine specimens**  
282

## Dendrite Demo

Instructions Database Description

Add Filter

Filter 1  
Remove

diagnoses\_safe x

spc\_from\_dx x

Contain x

OR x

void

### Filters info list:

Filter 1: ['diagnoses\_safe', 'spc\_from\_dx', 'Contain', 'OR', 'void']

Filter Logic: Only one logic inside a pair of parentheses, use a pair of parentheses if only use one filter

(1)

x diagnoses\_safe x

20 x

Final Query Table Rows Summary ~ 4178 rows, 4178 unique ids, 2740 unique patient ids -

Export

| id_safe                              | spc_from_dx    | dx_txt_no_spc                       |
|--------------------------------------|----------------|-------------------------------------|
| 000184e0-ee63-11ec-9e49-8c8caa4dd5eb | Urine, voided: | 999 ** Negative for High Grade Urot |
| 000314e3-ee63-11ec-9e49-8c8caa4dd5eb | Urine, voided: | 999 ** Atypical Urothelial Cell     |
| 0003d966-ee63-11ec-9e49-8c8caa4dd5eb | Urine, Voided: | 999 ** Negati                       |
| 001722c5-ee63-11ec-9e49-8c8caa4dd5eb | Urine, voided: | 999 ** Negative for High Grade Urot |
| 00180611-ee63-11ec-9e49-8c8caa4dd5eb | Urine, voided: | 999 ** Negative for High Grade Urot |
| 001b12cb-ee63-11ec-9e49-8c8caa4dd5eb | Urine, voided: | 999 ** Atypical Urothelial Cell     |
| 001eecd8-ee63-11ec-9e49-8c8caa4dd5eb | Urine, voided: | 999 ** Negati                       |
| 0023b27d-ee63-11ec-9e49-8c8caa4dd5eb | Urine, voided: | 999 ** Negative for High Grade Urot |
| 00291e8d-ee63-11ec-9e49-8c8caa4dd5eb | Urine, voided: | 999 ** Negative for High Grade Urot |
| 00363bc2-ee63-11ec-9e49-8c8caa4dd5eb | Urine, voided: | 999                                 |
| 00417db0-ee63-11ec-9e49-8c8caa4dd5eb | Urine, voided: | 999 ** Atypical Urothelial Cell     |
| 00462303-ee63-11ec-9e49-8c8caa4dd5eb | Urine, voided: | 999 ** Negati                       |

283  
284

**Figure 6: Querying diagnostic text for voided urine specimens**

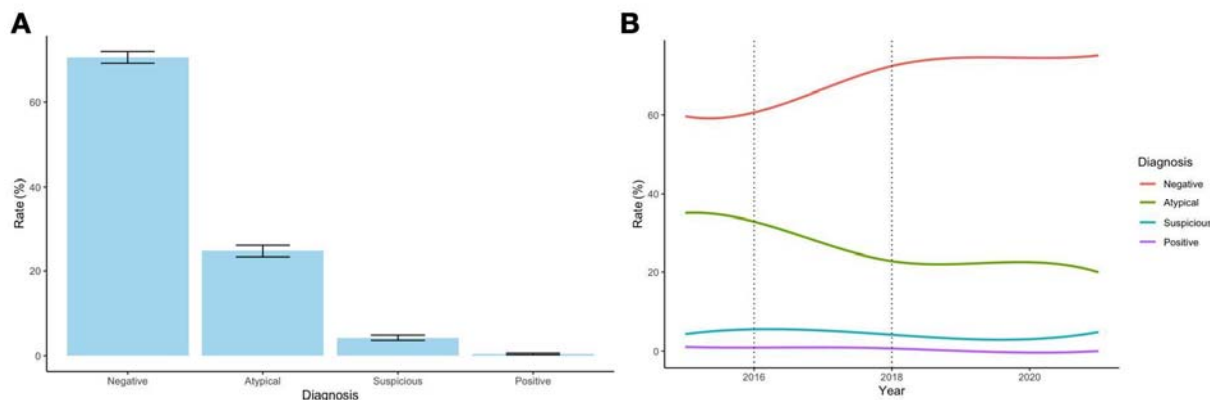

285  
286  
287  
288  
289  
290  
291  
292  
293  
294

**Figure 7: Breakdown of The Paris System diagnostic assignments: A)** Aggregated across the entire database reporting period, and **B)** Yearly over time across the reporting period; vertical lines indicate publication of the official TPS guidelines (2016) followed by official implementation of the guidelines in 2018

**Table 1: Regression Coefficients from Statistical Model Comparing Atypia Rates between Various Implementation Periods for The Paris System:** Odds ratio above one indicates that atypia rates increased over time whereas below one indicates reductions in reported atypia compared to the other TPS categories

| Parameter                                                                          | Odds Ratio | 2.5% CI | 97.5% CI | p-value |
|------------------------------------------------------------------------------------|------------|---------|----------|---------|
| Degree of Implementation: Post-Implementation > Post-Publication > Pre-Publication | 0.90       | 0.82    | 0.97     | 0.01    |
| Post-Implementation vs. Post-Publication                                           | 0.94       | 0.80    | 1.00     | 0.01    |

|                                         |      |      |      |      |
|-----------------------------------------|------|------|------|------|
| Post-Implementation vs. Pre-Publication | 0.80 | 0.68 | 0.95 | 0.01 |
| Post-Publication vs. Pre-Publication    | 0.87 | 0.72 | 0.99 | 0.01 |

295  
 296 *Colon adenocarcinoma cases:* A GI pathologist attempted our second search. We sought to pull  
 297 MLH1 staining results from colon adenocarcinoma cases to assess for mismatch repair  
 298 deficiency to build a retrospective cohort that assesses the metastatic potential of this subgroup  
 299 in addition to pulling corresponding whole slide images for a digital image analysis. To do this,  
 300 three filters were constructed– the first two from the diagnostic text tables and the final one from  
 301 the staining results tables. We first filtered by whether the text contained “colon” and  
 302 “adenocarcinoma”. The final filter sought to query for cases where MLH1 staining had been  
 303 done. Multiple stains were ordered for specific cases. The interactive filtering mechanisms of the  
 304 final display table were used to subset stains by MLH1 status. For the final query, this table was  
 305 merged with a whole slide image table, which specifies the file locations of all matching whole  
 306 slide images for tissue slides stained with hematoxylin and eosin within our Aperio Image  
 307 server. This search yielded approximately 676 pathology reports (**Figure 8**). We conducted  
 308 additional filtering for other mismatch repair related genes (MLH1/PMS2 and MSH2/MSH6 form  
 309 two separate heterodimers with different progression characteristics but indicative of the  
 310 microsatellite instability pathway). Results were exported to a CSV file. The CSV file contained  
 311 information on staining results and the file locations of whole slide images within our Aperio  
 312 image server. Staining results were further processed using a custom R script to generate a bar  
 313 plot of negative and positive staining findings, identifying significantly higher instances of loss of  
 314 expression for the MLH1/PMS2 heterodimer as assessed through immunohistochemistry  
 315 (**Figure 9A**). This information was also used to pull the corresponding whole slide images of  
 316 H&E stained tissue (**Figure 9B**).  
 317

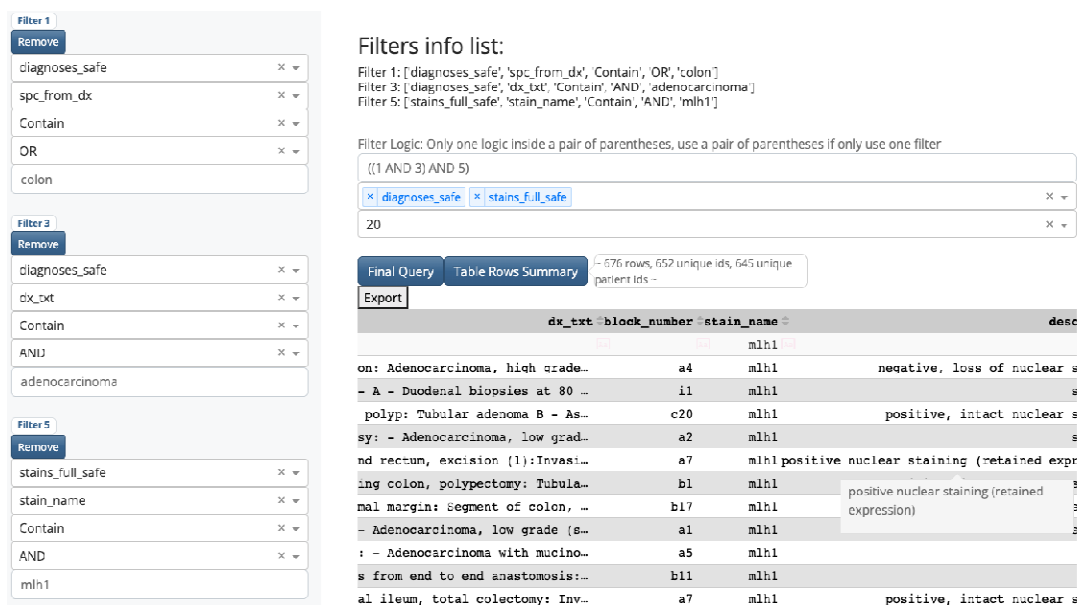

318  
 319 **Figure 8: Query results of diagnostic text and staining information for Colon**  
 320 **Adenocarcinoma cases for potential mismatch repair deficiency**  
 321

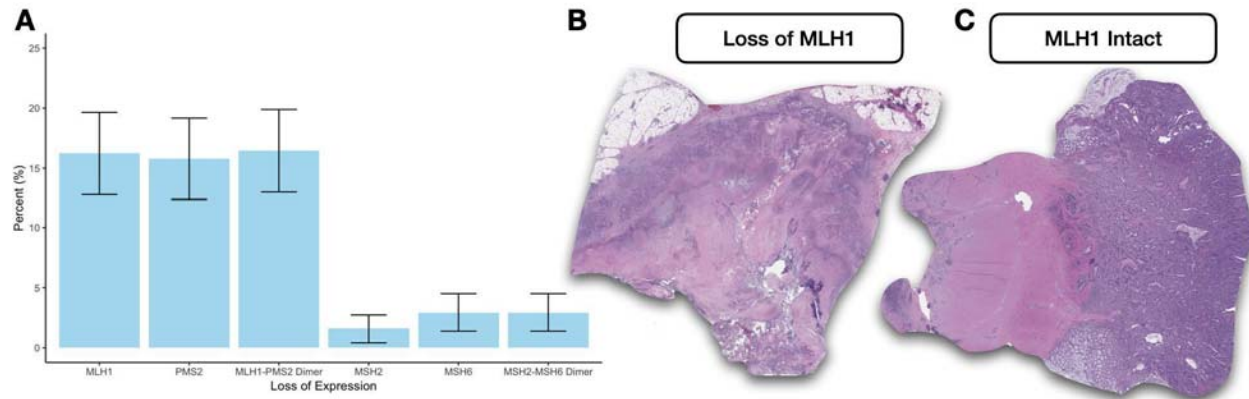

322  
323 **Figure 9: Further analysis of extracted Dendrite table for studying colon cancer**  
324 **mismatch repair deficiency: A)** Breakdown of loss of expression for mismatch repair genes as  
325 assessed through immunohistochemistry; **B)** Whole slide images extracted using Dendrite  
326 image file location information illustrating slides with and without MLH1 positive staining  
327

328 *Qualitative description of the pathologist experience using Dendrite:* From discussions with  
329 pathologists in our department, we found that compared to the search functionality from our  
330 EMR (Cerner), the pathologists found Dendrite to be faster, more responsive and flexible.  
331 Pathologists were able to finalize search criteria across hundreds of thousands of cases and  
332 merge information from disparate data sources in seconds. The secondary search / filtering  
333 capabilities offered using the interactive display table were found to be particularly effective in  
334 further refining the search results.

## 335 Discussion

336 By leveraging expert domain knowledge and natural language processing algorithms to parse  
337 free-text pathology reports into structured multi-table formats, Dendrite presents a viable  
338 database tool that pathologists can use to rapidly build study cohorts and leverage for quality  
339 improvement purposes to complement other emerging EMR systems.  
340

341 While we have implemented an initial prototype of the Dendrite web application and deployed  
342 this tool over AWS, there are many areas where this tool can be improved. First, we plan to  
343 develop and expand a user management system, which will allow for user logins and permit  
344 tracking of user data<sup>18</sup>. This will help us determine the broad utilization of this tool within the  
345 department and areas to improve this application for further widespread adoption. Users will be  
346 able to access their search history offline to help guide more informed searches as users gain  
347 more familiarity with the system. Leveraging the users' search history can also help personalize  
348 further searches based on their preferences (e.g., accurate suggestions and operations). For  
349 example, if some users are accustomed to querying data about colon cancer, then the keywords  
350 related to colon cancer can be suggested through the integration of knowledge and semantic  
351 databases which link biological entities. Natural language processing algorithms can continue to  
352 improve their suggestions and complex instructions through the accumulation of more data and  
353 user feedback.

354  
355 Furthermore, we plan to further integrate NLP (natural language processing) and machine  
356 learning technologies into this web application in order to mine free text data to extract  
357 structured reporting information that may be more readily queryable. This will be accomplished  
358 by configuring multiple machine learning algorithms to make predictions across multiple tasks,  
359 including but not limited to 1) CPT code prediction to identify instances of underbilling<sup>19</sup>, 2)  
360 named entity recognition tasks (e.g., extraction of staining information, histological findings)<sup>20</sup>,  
361 and 3) instances where an outside consult is needed, etc. Trained predictive algorithms can be  
362 further integrated into future iterations of this web application. Large language models (LLMs)  
363 offer a promising approach by capturing nuanced contexts and relationships. We acknowledge  
364 that the reporting information is still incomplete and biased towards certain subspecialties, and  
365 we are aware that more work is needed to extract information from less common or structured  
366 specialties. This database features record linkages to imaging data. Further integration of our  
367 text database into our genomics and imaging infrastructure can enhance its search capabilities  
368 as well as motivate future multimodal analysis<sup>21</sup>.

## 369 **Conclusion**

370 Dendrite, a web application developed using natural language processing and expert  
371 knowledge, offers pathologists a flexible search capability for conducting large-scale  
372 assessments of clinical pathology reports in the context of clinical research and quality  
373 improvement. The application employs various features to enable efficient search functionality,  
374 including filters that can be combined using conditional logic statements, comprehensive  
375 merging of reporting tables associated with selected pathology reports, and dynamic sorting and  
376 filtering operations on the display table. These features greatly facilitate the search process for  
377 pathology data, making it easier and more convenient for pathologists in their clinical and  
378 research endeavors.

## 379 **References**

- 380 1. Berho, M. & Bejarano, P. A. Judging pathological assessment in cancer specimens. *Journal*  
381 *of Surgical Oncology* **110**, 543–550 (2014).
- 382 2. Nagtegaal, I. D., West, N. P., van Krieken, J. H. J. & Quirke, P. Pathology is a necessary  
383 and informative tool in oncology clinical trials. *The Journal of Pathology* **232**, 185–189  
384 (2014).
- 385 3. Hirschberg, J. & Manning, C. D. Advances in natural language processing. *Science* **349**,  
386 261–266 (2015).
- 387 4. Daniel, C. *et al.* Standards to Support Information Systems Integration in Anatomic  
388 Pathology. *Archives of Pathology & Laboratory Medicine* **133**, 1841–1849 (2009).
- 389 5. Krasowski, M. D. *et al.* Implementation of Epic Beaker Clinical Pathology at an academic  
390 medical center. *Journal of Pathology Informatics* **7**, 7 (2016).
- 391 6. Allada, A. K. *et al.* Analysis of Language Embeddings for Classification of Unstructured  
392 Pathology Reports. in *2021 43rd Annual International Conference of the IEEE Engineering*  
393 *in Medicine & Biology Society (EMBC)* 2378–2381 (2021).  
394 doi:10.1109/EMBC46164.2021.9630347.



- 395 7. Schadow, G. & McDonald, C. J. Extracting Structured Information from Free Text Pathology  
396 Reports. *AMIA Annu Symp Proc* **2003**, 584–588 (2003).
- 397 8. Arvisais-Anhalt, S. *et al.* Searching Full-Text Anatomic Pathology Reports Using Business  
398 Intelligence Software. *Journal of Pathology Informatics* **13**, 100014 (2022).
- 399 9. Green, D. *et al.* Clinical Implementation of a Robust Cloud-Based Architecture for the  
400 Analysis of Somatic Whole Exome Sequencing Data. in *JOURNAL OF MOLECULAR*  
401 *DIAGNOSTICS* vol. 24 S86–S86 (ELSEVIER SCIENCE INC STE 800, 230 PARK AVE,  
402 NEW YORK, NY 10169 USA, 2022).
- 403 10. Wender, R. C., Brawley, O. W., Fedewa, S. A., Gansler, T. & Smith, R. A. A blueprint for  
404 cancer screening and early detection: Advancing screening's contribution to cancer control.  
405 *CA: A Cancer Journal for Clinicians* **69**, 50–79 (2019).
- 406 11. Greenburg, J. *et al.* Development of an interactive web dashboard to facilitate the  
407 reexamination of pathology reports for instances of underbilling of CPT codes. *Journal of*  
408 *Pathology Informatics* **14**, 100187 (2023).
- 409 12. Lantada, A. D. & Morgado, P. L. Rapid Prototyping for Biomedical Engineering: Current  
410 Capabilities and Challenges. *Annual Review of Biomedical Engineering* **14**, 73–96 (2012).
- 411 13. Dabbas, E. *Interactive Dashboards and Data Apps with Plotly and Dash: Harness the power*  
412 *of a fully fledged frontend web framework in Python–no JavaScript required.* (Packt  
413 Publishing Ltd, 2021).
- 414 14. Levy, J. J. *et al.* Large-scale longitudinal comparison of urine cytological classification  
415 systems reveals potential early adoption of The Paris System criteria. *J Am Soc Cytopathol*  
416 *S2213-2945(22)00241-1* (2022) doi:10.1016/j.jasc.2022.08.001.
- 417 15. Bürkner, P.-C. Advanced Bayesian Multilevel Modeling with the R Package brms. *The R*  
418 *Journal* **10**, 395–411 (2018).
- 419 16. Bürkner, P.-C. & Charpentier, E. Modelling monotonic effects of ordinal predictors in  
420 Bayesian regression models. *British Journal of Mathematical and Statistical Psychology*  
421 **n/a**.
- 422 17. Lenth, R. V. *et al.* emmeans: Estimated Marginal Means, aka Least-Squares Means. (2023).
- 423 18. Kim, J. Y., Gudewicz, T. M., Dighe, A. S. & Gilbertson, J. R. The pathology informatics  
424 curriculum wiki: Harnessing the power of user-generated content. *J Pathol Inform* **1**, 10  
425 (2010).
- 426 19. Levy, J., Vattikonda, N., Haudenschild, C., Christensen, B. & Vaickus, L. Comparison of  
427 machine-learning algorithms for the prediction of current procedural terminology (CPT)  
428 codes from pathology reports. *Journal of Pathology Informatics* **13**, 3 (2022).
- 429 20. Oliwa, T. *et al.* Obtaining Knowledge in Pathology Reports Through a Natural Language  
430 Processing Approach With Classification, Named-Entity Recognition, and Relation-  
431 Extraction Heuristics. *JCO clinical cancer informatics* **3**, 1–8 (2019).
- 432 21. Lu, M. Y. *et al.* Towards a Visual-Language Foundation Model for Computational Pathology.  
433 Preprint at <https://doi.org/10.48550/arXiv.2307.12914> (2023).
- 434
- 435



436 **Supplementary**

437

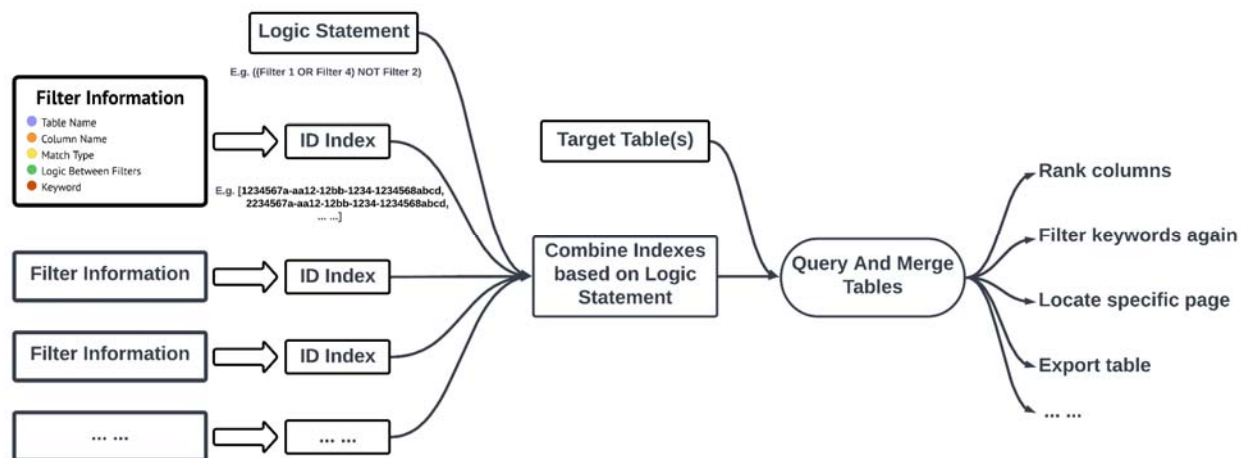

438

439 **Supplementary Figure 1: Illustration of table querying logic using Dendrite Web**

440 **Application:** Separate filters are specified by the user. Each filter returns a list of pathology  
441 report IDs. Indices are joined through intersection and union operations based on user-specified  
442 logic statements. Target tables are selected, each filtered based on the final set of report IDs.  
443 Additional table operations may be performed prior to export.

444

445 **Additional Information on Dendrite Web Application Text Search Workflow**

446 In the intermediate level of the Dendrite searching process, every action on the interface level  
447 will have a corresponding processing interaction in the underlying level. The first step is to  
448 collect the information from the filters, including table name, column name, match type, logic  
449 choice and keyword. It involves multiple callbacks. For example, the column name depends on  
450 the table. The column choices will only update after the table is chosen. Each filter will generate  
451 an index list from a specific table. All of the filters' information will be displayed on the right side  
452 of the screen, so that it remains visible to facilitate user experience. Filters are removable, and  
453 once removed, will be deleted from the display window with no information saved.

454

455 The next step is to verify the logic statement. By inputting logic choices in the filter, Dendrite will  
456 automatically generate a logic statement in the order of the filter indexes. Physicians can also  
457 edit the logic statement by adding, removing and reordering the filter indexes. Dendrite will then  
458 parse the statement and query the index in order. It will then combine the indexes based on the  
459 logic between them. For example, if the logic between two filters is "OR", Dendrite will keep all  
460 indexes. However if the logic is "AND", Dendrite will only keep the intersection of the indexes,  
461 and then form a final index list. After that Dendrite will extract the table, based on the target  
462 table(s) input by the physicians. It will retain the rows which have the same indexes as the final  
463 indexes list. And then merge these tables together to the final table. During the merging, if a  
464 missing value appears, it will be left blank. Clicking on Query will display the Table. Inside this  
465 table, physicians can further filter the keyword or perform operations. Dendrite will recognize the  
466 column content type as a string data or numeric data, and then rank it in alphabetical order or  
467 numerical order. And the table data will be saved. The generated table data will be exportable  
468 via the download option.

469  
470  
471  
472  
473  
474  
475  
476  
477  
478  
479  
480

Physicians can select multiple keyword-based search terms at the same time and combine these search terms in any way they want. For example, they can select any two conditions that are logically related to "AND" or "OR" or "NOT". This allow physicians to perform real-time interactive data manipulation across one or more target tables that have been merged together. Also, the application automatically recognizes the table data types, allowing it to perform different sorting operations for tables that contain character and numeric data. Physicians can filter the table further by adding filters. While taking into account the readability of the data, the data table provides page numbering and scrollable axis functionality. This allows for more precise targeting of rows and also extends the table's display range while maintaining readability.

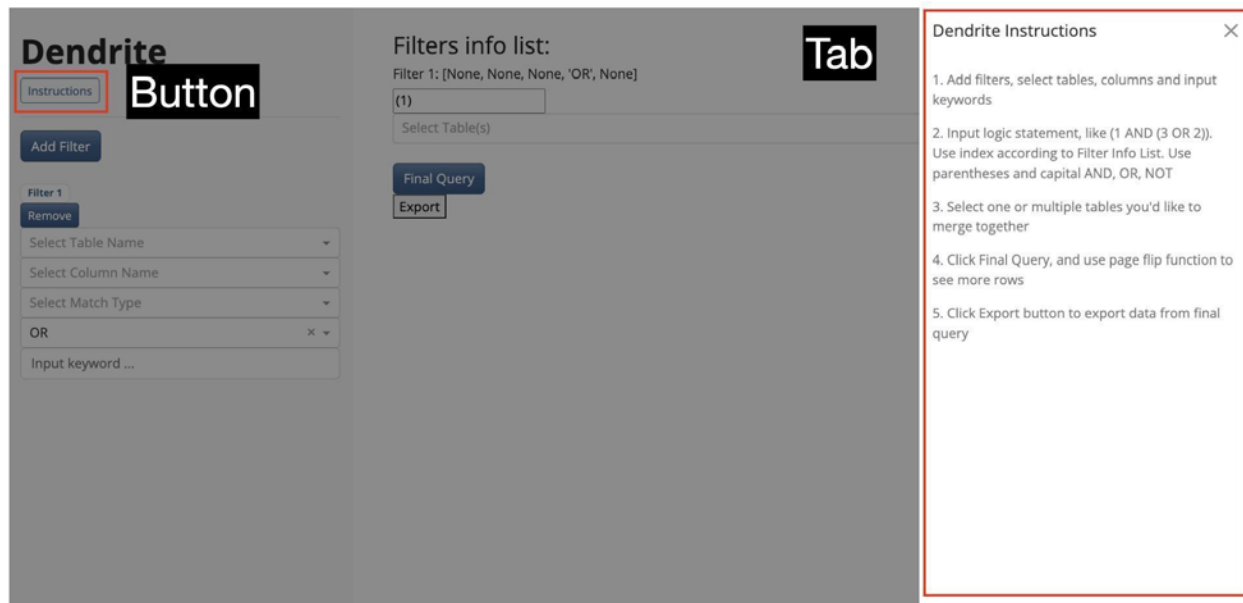

481  
482  
483  
484  
485  
486  
487  
488  
489  
490  
491  
492

**Supplementary Figure 2: Dendrite Instructions Tab** In case of unfamiliarity with operation of the web application, we developed an instruction tab that will appear by clicking the instruction button directly below the title. With readability in mind, we designed the instruction tab to appear by sliding from the right. This allows users to read the guide while simultaneously having access to the main dendrite content on the left, enabling immediate recognition on the interface of salient features described in the instructions.

### Additional Information on Structured Dendrite Table Schema

**Supplementary Table 1: Pathology database table names, column names, data types and metadata**

| Table Name | Column Name | Data Type       | Note                                                                                                  |
|------------|-------------|-----------------|-------------------------------------------------------------------------------------------------------|
| ap_case    | id_safe     | UUID in varchar | UUID in varchar; maps 1:1 to surgical accession. Relationship to patient is a separate linking table. |

|                                |                       |                           |                                                                                                                                  |
|--------------------------------|-----------------------|---------------------------|----------------------------------------------------------------------------------------------------------------------------------|
|                                | pathologist           | varch<br>ar               | Name of pathologist signing out case.                                                                                            |
|                                | qacc                  | tinyin<br>t               | Dummy variable - Does "qacc" appear in report text? (i.e, Intradepartmental consultation sought?)                                |
|                                | dw_doc                | tinyin<br>t               | Dummy variable - Indicates whether the case describes discussion with another physician.                                         |
|                                | conf                  | tinyin<br>t               | Dummy variable - Does the case mention an intradepartmental or consensus conference?                                             |
|                                | addend                | tinyin<br>t               | Dummy variable - Does the report contain any addenda?                                                                            |
|                                | syn                   | tinyin<br>t               | Dummy variable - Does the report have a synoptic section?                                                                        |
|                                | frz                   | tinyin<br>t               | Dummy variable - Does the report have a frozen section?                                                                          |
|                                | steps                 | tinyin<br>t               | Dummy variable - Does the report contain common ways of describing additional sections?                                          |
|                                | decal                 | tinyin<br>t               | Dummy variable - Does the report mention decalcification?                                                                        |
|                                | edta                  | tinyin<br>t               | Dummy variable - Does the report mention EDTA decalcification?                                                                   |
|                                | ssc                   | varch<br>ar               | Subspeciality code.                                                                                                              |
|                                | svc                   | varch<br>ar               | Service calculated from subspeciality code at Python script runtime.                                                             |
|                                | case_refs             | int                       | Attempts to count the DH surgical accession number mentioned in the report text.                                                 |
|                                | indecision            | int                       | Counts keywords related to indecision or uncertainty.                                                                            |
|                                | lesser_indeci<br>sion | int                       | Counts keywords related to lesser degrees of indecision or uncertainty.                                                          |
|                                | negation              | int                       | Counts keywords related to negation.                                                                                             |
|                                | TAT                   | int                       | Calculated field - Turnaround time, measured as the difference between valid_int and sub_int.                                    |
|                                | valid_int             | int                       | Interval between a secret date and validation of the case. Was automatically converted back to validation date using secret key. |
|                                | sub_int               | int                       | Interval between a secret date and submission of the case. Was automatically converted back to validation date using secret key. |
| case_parts<br>: 1:1 to<br>case | id_safe               | UUID<br>in<br>varch<br>ar | UUID in varchar; maps 1:1 to surgical accession.                                                                                 |
|                                | case_parts            | text                      | List of parts of the case, as described by clinical team                                                                         |
|                                | clin_hxdx             | text                      | Brief history and diagnosis as provided by clinical team.                                                                        |
| diagnoses:<br>1:1 to case      | id_safe               | UUID<br>in<br>varch<br>ar | UUID in varchar; maps 1:1 to surgical accession.                                                                                 |

|                              |               |                 |                                                                                |
|------------------------------|---------------|-----------------|--------------------------------------------------------------------------------|
|                              | spc_from_dx   | text            | Attempts to capture the part of diagnosis that describes the specimen.         |
|                              | dx_txt_no_spc | text            | Attempts to capture diagnosis with specimen removed.                           |
|                              | dx_txt        | text            | Contains the entire "diagnosis" field.                                         |
| discussions: 1:1 to case     | id_safe       | UUID in varchar | UUID in varchar; maps 1:1 to surgical accession.                               |
|                              | ds_txt        | text            | Deidentified discussion text.                                                  |
| gross: many-to-one to case   | id_safe       | UUID in varchar | UUID in varchar; maps 1:1 to surgical accession.                               |
|                              | part          | varchar         | Part of the case to which the row belongs.                                     |
|                              | subsection    | varchar         | Subsection of the gross to which the row belongs.                              |
|                              | field_name    | text            | Name of the reported field (e.g., tumor size, weight of specimen).             |
|                              | field_val     | text            | Value of the field in text format, regardless of numeric nature.               |
| h_and_e: many-to-one to case | id_safe       | UUID in varchar | UUID in varchar; maps 1:1 to surgical accession.                               |
|                              | slide_no      | varchar         | Block letter and number to which the slide belongs.                            |
|                              | description   | text            | Prosector's description of tissue submitted for the slide.                     |
| pt_cases_safe                | pt_id_safe    | UUID in varchar | UUID in varchar; maps 1:1 to MRN and many-to-one to id_safe.                   |
|                              | id_safe       | UUID in varchar | UUID in varchar; maps 1:1 to surgical accession and many-to-one to pt_id_safe. |
| scans: many-to-one to case   | id_scans      | int             | Autoincrement; related to surgical accession.                                  |
|                              | id_safe       | UUID in varchar | UUID in varchar; maps 1:1 to surgical accession.                               |
|                              | slide_id      | int             | Aperio server slide id.                                                        |
|                              | block         | varchar         | Block (if available) stained.                                                  |
|                              | link          | varchar         | Calculated field - Readymade GET request to Aperio server.                     |

|                                     |              |                 |                                                                                                                             |
|-------------------------------------|--------------|-----------------|-----------------------------------------------------------------------------------------------------------------------------|
| stains_full:<br>many-to-one to case | id_safe      | UUID in varchar | UUID in varchar; maps 1:1 to surgical accession.                                                                            |
|                                     | block_number | varchar         | Block number for the stain, if identifiable.                                                                                |
|                                     | stain_name   | varchar         | Name of the stain performed.                                                                                                |
|                                     | result       | varchar         | Result of the stain performed, if identified.                                                                               |
| stains_short: many-to-one to case   | id_safe      | UUID in varchar | UUID in varchar; maps 1:1 to surgical accession.                                                                            |
|                                     | stain        | varchar         | Name of the stain performed.                                                                                                |
| synoptics:<br>many-to-one to case   | id_safe      | UUID in varchar | UUID in varchar; maps 1:1 to surgical accession.                                                                            |
|                                     | field_name   | varchar         | Name of synoptic report field.                                                                                              |
|                                     | field_val    | varchar         | Name of synoptic report field.                                                                                              |
|                                     | Note         |                 | Valid only for reports generated during later time periods; earlier synoptics are not as well-delineated.                   |
| flow:                               | id_safe      | UUID in varchar | UUID in varchar; maps 1:1 to surgical accession.                                                                            |
|                                     | viability    | int             | Attempts to detect percent viability with regex.                                                                            |
|                                     | source       | varchar         | Specimen source.                                                                                                            |
|                                     | markers      | varchar         | Comma-separated list of markers tested by flow, if detected.                                                                |
|                                     | flowdx       | text            | Classification of diagnosis section relating to flow.                                                                       |
|                                     | flowds       | test            | Classification of discussion section relating to flow.                                                                      |
|                                     | Note         |                 | Changes in flow cytometry reporting over the years; some aspects of cases with flow may be identified with lower precision. |
| cy_gyn:                             | id_safe      | UUID in varchar | UUID in varchar; maps 1:1 to surgical accession.                                                                            |
|                                     | hpv_opt      | varchar         | HPV option chosen.                                                                                                          |

|                                             |                    |                             |                                                                                                                                                        |
|---------------------------------------------|--------------------|-----------------------------|--------------------------------------------------------------------------------------------------------------------------------------------------------|
|                                             |                    | ar                          |                                                                                                                                                        |
|                                             | prep               | varchar<br>ar               | Preparation type.                                                                                                                                      |
|                                             | source             | varchar<br>ar               | Cervical/endocervical/vaginal source.                                                                                                                  |
|                                             | hormones           | varchar<br>ar               | Patient on hormone therapy?                                                                                                                            |
|                                             | hyst               | varchar<br>ar               | History of hysterectomy?                                                                                                                               |
|                                             | post_partum        | varchar<br>ar               | Post-partum pap smear?                                                                                                                                 |
|                                             | preg               | varchar<br>ar               | Patient pregnant during smear?                                                                                                                         |
|                                             | iud                | varchar<br>ar               | Patient has an IUD?                                                                                                                                    |
|                                             | pelvic_rads        | varchar<br>ar               | Patient history of pelvic radiation?                                                                                                                   |
|                                             | prior_gy_tx        | varchar<br>ar               | Prior gynecologic treatment?                                                                                                                           |
|                                             | hx_abnl_pap<br>_bx | varchar<br>ar               | History of prior abnormal pap or cervix biopsy?                                                                                                        |
|                                             | hpv_vacc           | varchar<br>ar               | Patient received the HPV vaccine?                                                                                                                      |
|                                             | smoker             | varchar<br>ar               | Patient smoke?                                                                                                                                         |
|                                             | des                | varchar<br>ar               | Patient history of in-utero exposure to diethylstilbestrol?                                                                                            |
|                                             | icd_dx             | varchar<br>ar               | ICD10 diagnosis code (not present for many reports).                                                                                                   |
|                                             | clin_hx_imp        | text                        | Free text clinical history and impression.                                                                                                             |
|                                             | Note               |                             | Only cases which a pathologist has handled have matching MRNs. Many of these fields are Yes/No most of the time with occasional free-text description. |
| cy_hpv:                                     | id_safe            | UUID<br>in<br>varchar<br>ar | UUID in varchar; maps 1:1 to surgical accession.                                                                                                       |
|                                             | hpv_status         | tinyint                     | HPV status: 0 negative, 1 positive.                                                                                                                    |
|                                             | hpv_type           | varchar<br>ar               | HPV type: 16, 18, or Other High Risk.                                                                                                                  |
|                                             | Note               |                             | Many-to-one to surgical accessions - patient can be positive for multiple HPV types                                                                    |
| cy_ng: All non-GYN cases, including urines. | id_safe            | UUID<br>in<br>varchar<br>ar | UUID in varchar; maps 1:1 to surgical accession.                                                                                                       |
|                                             | source             | varchar                     | Source of specimen.                                                                                                                                    |



|                                                                        |              |                       |                                                                                                                                                                                                                                                 |
|------------------------------------------------------------------------|--------------|-----------------------|-------------------------------------------------------------------------------------------------------------------------------------------------------------------------------------------------------------------------------------------------|
|                                                                        |              | ar                    |                                                                                                                                                                                                                                                 |
|                                                                        | site         | varchar               | Another location description.                                                                                                                                                                                                                   |
|                                                                        |              | ar                    |                                                                                                                                                                                                                                                 |
|                                                                        | clin_hx_tx   | varchar               | Partially overlapping clinician's impression of case.                                                                                                                                                                                           |
|                                                                        |              | ar                    |                                                                                                                                                                                                                                                 |
|                                                                        | clin_hx_imp  | varchar               | Partially overlapping clinician's impression of case.                                                                                                                                                                                           |
|                                                                        |              | ar                    |                                                                                                                                                                                                                                                 |
|                                                                        | clin_imp     | varchar               | Partially overlapping clinician's impression of case.                                                                                                                                                                                           |
|                                                                        |              | ar                    |                                                                                                                                                                                                                                                 |
|                                                                        | rads_finding | varchar               | Radiology findings per the clinician.                                                                                                                                                                                                           |
|                                                                        | s            | ar                    |                                                                                                                                                                                                                                                 |
|                                                                        | gross        | varchar               | Gross description of the specimen.                                                                                                                                                                                                              |
|                                                                        |              | ar                    |                                                                                                                                                                                                                                                 |
|                                                                        | thy_size     | varchar               | Thyroid specific: Lesion size.                                                                                                                                                                                                                  |
|                                                                        |              | ar                    |                                                                                                                                                                                                                                                 |
|                                                                        | thy_echo     | varchar               | Thyroid specific: Echogenicity                                                                                                                                                                                                                  |
|                                                                        |              | ar                    |                                                                                                                                                                                                                                                 |
|                                                                        | thy_cyst     | varchar               | Thyroid specific: Cyst or not?                                                                                                                                                                                                                  |
|                                                                        |              | ar                    |                                                                                                                                                                                                                                                 |
|                                                                        | thy_calc     | varchar               | Thyroid specific: Calcified?                                                                                                                                                                                                                    |
|                                                                        |              | ar                    |                                                                                                                                                                                                                                                 |
|                                                                        | thy_vasc     | varchar               | Thyroid specific: Vascularity?                                                                                                                                                                                                                  |
|                                                                        |              | ar                    |                                                                                                                                                                                                                                                 |
|                                                                        | ia_byline    | varchar               | Immediate assessment physician and text.                                                                                                                                                                                                        |
|                                                                        |              | ar                    |                                                                                                                                                                                                                                                 |
|                                                                        | Note         |                       | Prior to the creation of the FN prefix (about 20% of the dataset falls into this timeframe), also included FNAs.                                                                                                                                |
| cy_ia:<br>Immediate<br>assessment<br>data from<br>FNA and<br>NG cases. | id_safe      | UUID<br>in<br>varchar | UUID in varchar; maps 1:1 to surgical accession.                                                                                                                                                                                                |
|                                                                        |              | ar                    |                                                                                                                                                                                                                                                 |
|                                                                        | passes       | int                   | Number of passes in immediate assessment.                                                                                                                                                                                                       |
|                                                                        | slides       | int                   | Number of slides in immediate assessment.                                                                                                                                                                                                       |
|                                                                        | txt          | text                  | Actual content of the immediate assessment episode.                                                                                                                                                                                             |
|                                                                        | Note         |                       | Specific to pathologist. Each row is one assessment episode. See ia_byline in cy_ng table for the identity of the assessing pathologist, as it is extremely rare for two immediate assessments on the same case to be done by different people. |
| Molecular_<br>result:                                                  | id_safe      | UUID<br>in<br>varchar | UUID in varchar; maps 1:1 to surgical accession.                                                                                                                                                                                                |
|                                                                        |              | ar                    |                                                                                                                                                                                                                                                 |
|                                                                        | mol_res_txt  | text                  | Text of the molecular pathology result.                                                                                                                                                                                                         |
